# Supplementary material for: UQCRH downregulation promotes Warburg effect in renal cell carcinoma cells
Source: PubMed Central journal article supplement (PMC7490363; doi:10.1038/s41598-020-72107-2), 2020-09-14
Supplement: 41598_2020_72107_MOESM1_ESM.pdf [file 41598_2020_72107_MOESM1_ESM.pdf]

## Supplementary Information

### **UQCRH Downregulation Promotes Warburg Effect in Renal Cell Carcinoma Cells**

Yanting Luo , Louise Medina Bengtsson, Xuechun Wang, Tianhe Huang, Guoqiang Liu, Sean Murphy, Caiqin Wang, John Koren III, Zachary Schafer, Xin Lu

Supplementary Figure 1

Supplementary Figure 2

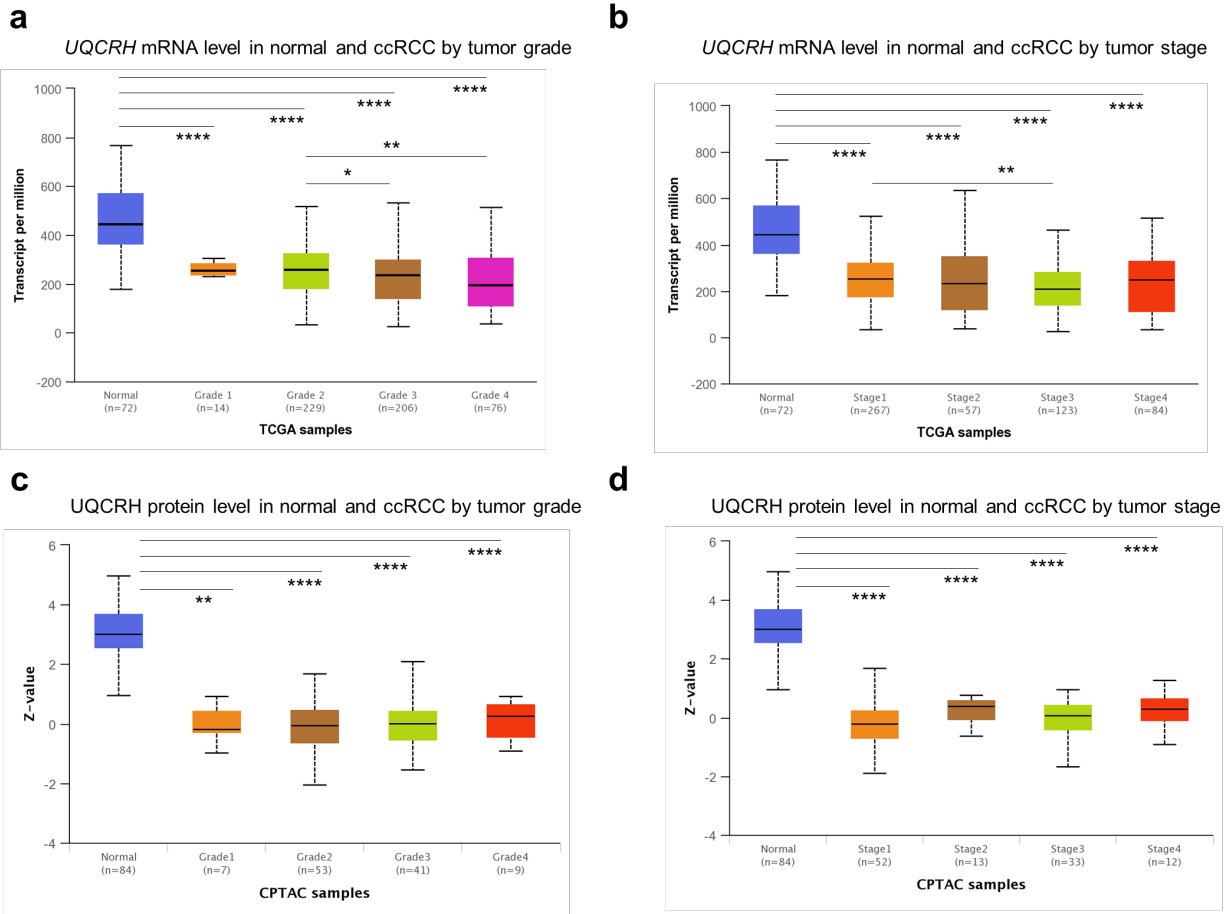

**Supplementary Figure 1.** UQCRH expression analysis in ccRCC. **(a-b)** *UQCRH* transcript level in normal tissue and ccRCC of progressive grades or stages, based on TCGA data and analyzed with UALCAN. **(c-d)** *UQCRH* protein level in normal and ccRCC of progressive grades or stages, based on CPTAC data and analyzed with UALCAN. Definition for grades: Grade 1, well differentiated (low grade); Grade 2, moderately differentiated (intermediate grade); Grade 3, poorly differentiated (high grade); Grade 4, undifferentiated (high grade). \*P<0.05, \*\*P<0.01, \*\*\*\*P<0.0001, unpaired t-test.

**Fig. 2c**

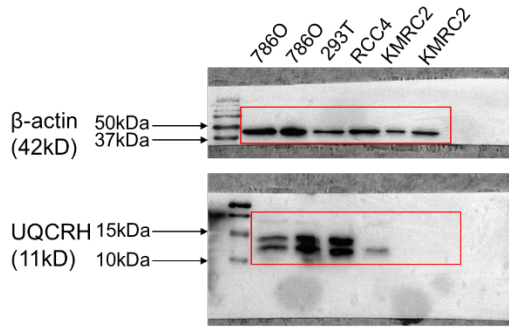

**Fig. 2d**

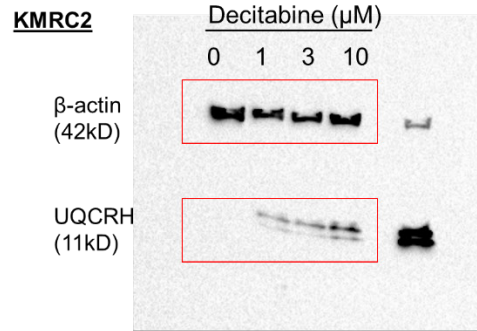

**Fig. 2e**

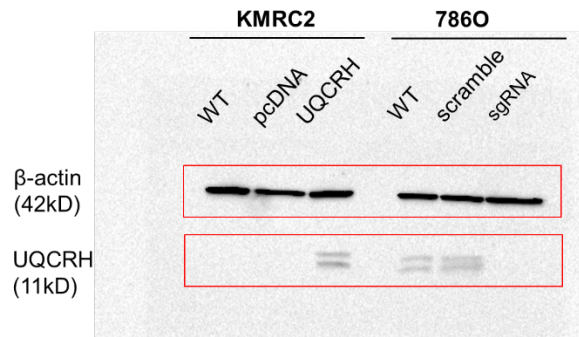

**Fig. 4c**

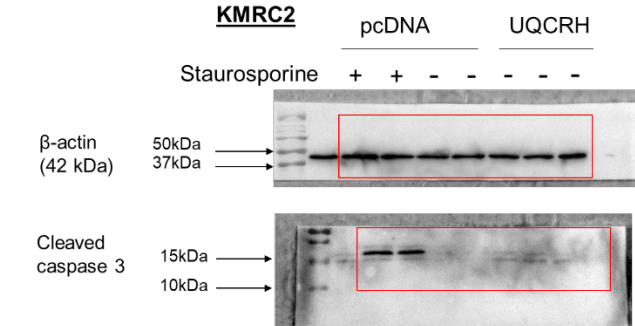

**Supplemental Figure 2.** Original unprocessed blots for the western blot results shown in main figures. Red rectangles indicate the areas of the blots that are cropped to show in main figure panels.
